# Supplementary material for: Multicenter Evaluation of the ePlex Respiratory Pathogen Panel for the Detection of Viral and Bacterial Respiratory Tract Pathogens in Nasopharyngeal Swabs
Source: PubMed Central journal article supplement (PMC5786739; doi:10.1128/jcm.01658-17), 2018-01-24
Supplement: JCM.01658-17_zjm999095822s1.pdf [file JCM.01658-17_zjm999095822s1.pdf]

## SUPPLEMENTAL TABLES

**Table S1. Prevalence of ePlex RP Panel Targets by Age Group During Prospective Collection With Samples Tested Fresh: September – October 2016**

| Organism                      | All Ages<br>(N=511) | Age 0-1<br>(N=73) | Age >1-5<br>(N=75) | Age >5-21<br>(N=75) | Age >21-65<br>(N=181) | Age >65<br>(N=107) |
|-------------------------------|---------------------|-------------------|--------------------|---------------------|-----------------------|--------------------|
| Adenovirus                    | 10 (2.0)            | 3 (4.1)           | 4 (5.3)            | 1 (1.3)             | 1 (0.6)               | 1 (0.9)            |
| Coronavirus                   | 8 (1.6)             | 2 (2.7)           | 0 (0.0)            | 1 (1.3)             | 4 (2.2)               | 1 (0.9)            |
| Human Metapneumovirus         | 0 (0.0)             | 0 (0.0)           | 0 (0.0)            | 0 (0.0)             | 0 (0.0)               | 0 (0.0)            |
| Human Rhinovirus/Enterovirus  | 188 (36.8)          | 37 (50.7)         | 40 (53.3)          | 33 (44.0)           | 58 (32.0)             | 20 (18.7)          |
| Influenza A                   | 0 (0.0)             | 0 (0.0)           | 0 (0.0)            | 0 (0.0)             | 0 (0.0)               | 0 (0.0)            |
| Influenza A 2009 H1N1         | 0 (0.0)             | 0 (0.0)           | 0 (0.0)            | 0 (0.0)             | 0 (0.0)               | 0 (0.0)            |
| Influenza A H1                | 0 (0.0)             | 0 (0.0)           | 0 (0.0)            | 0 (0.0)             | 0 (0.0)               | 0 (0.0)            |
| Influenza A H3                | 0 (0.0)             | 0 (0.0)           | 0 (0.0)            | 0 (0.0)             | 0 (0.0)               | 0 (0.0)            |
| Influenza B                   | 2 (0.4)             | 0 (0.0)           | 0 (0.0)            | 1 (1.3)             | 1 (0.6)               | 0 (0.0)            |
| Parainfluenza Virus 1         | 1 (0.2)             | 0 (0.0)           | 1 (1.3)            | 0 (0.0)             | 0 (0.0)               | 0 (0.0)            |
| Parainfluenza Virus 2         | 13 (2.5)            | 3 (4.1)           | 4 (5.3)            | 3 (4.0)             | 2 (1.1)               | 1 (0.9)            |
| Parainfluenza Virus 3         | 5 (1.0)             | 2 (2.7)           | 1 (1.3)            | 1 (1.3)             | 1 (0.6)               | 0 (0.0)            |
| Parainfluenza Virus 4         | 8 (1.6)             | 1 (1.4)           | 4 (5.3)            | 2 (2.7)             | 1 (0.6)               | 0 (0.0)            |
| Respiratory Syncytial Virus A | 8 (1.6)             | 5 (6.8)           | 3 (4.0)            | 0 (0.0)             | 0 (0.0)               | 0 (0.0)            |
| Respiratory Syncytial Virus B | 9 (1.8)             | 3 (4.1)           | 4 (5.3)            | 0 (0.0)             | 2 (1.1)               | 0 (0.0)            |
| <i>Chlamydia pneumoniae</i>   | 0 (0.0)             | 0 (0.0)           | 0 (0.0)            | 0 (0.0)             | 0 (0.0)               | 0 (0.0)            |
| <i>Mycoplasma pneumoniae</i>  | 4 (0.8)             | 0 (0.0)           | 1 (1.3)            | 2 (2.7)             | 1 (0.6)               | 0 (0.0)            |

**Table S2. Prevalence of ePlex RP Panel Targets by Age Group During Prospective Collection With Samples Tested After Being Frozen: March 2013 - August 2014**

| <b>Organism</b>               | <b>All Ages<br/>(N=1951)</b> | <b>Age 0-1<br/>(N=315)</b> | <b>Age &gt;1-5<br/>(N=250)</b> | <b>Age &gt;5-21<br/>(N=246)</b> | <b>Age &gt;21-65<br/>(N=745)</b> | <b>Age &gt;65<br/>(N=395)</b> |
|-------------------------------|------------------------------|----------------------------|--------------------------------|---------------------------------|----------------------------------|-------------------------------|
| Adenovirus                    | 72 (3.7)                     | 31 (9.8)                   | 24 (9.6)                       | 7 (2.8)                         | 7 (0.9)                          | 3 (0.8)                       |
| Coronavirus                   | 102 (5.2)                    | 19 (6.0)                   | 18 (7.2)                       | 16 (6.5)                        | 32 (4.3)                         | 17 (4.3)                      |
| Human Metapneumovirus         | 113 (5.8)                    | 22 (7.0)                   | 28 (11.2)                      | 6 (2.4)                         | 31 (4.2)                         | 26 (6.6)                      |
| Human Rhinovirus/Enterovirus  | 388 (19.9)                   | 113 (35.9)                 | 94 (37.6)                      | 58 (23.6)                       | 87 (11.7)                        | 36 (9.1)                      |
| Influenza A                   | 110 (5.6)                    | 6 (1.9)                    | 18 (7.2)                       | 20 (8.1)                        | 49 (6.6)                         | 17 (4.3)                      |
| Influenza A 2009 H1N1         | 76 (3.9)                     | 4 (1.3)                    | 13 (5.2)                       | 14 (5.7)                        | 37 (5.0)                         | 8 (2.0)                       |
| Influenza A H1                | 0 (0.0)                      | 0 (0.0)                    | 0 (0.0)                        | 0 (0.0)                         | 0 (0.0)                          | 0 (0.0)                       |
| Influenza A H3                | 34 (1.7)                     | 1 (0.3)                    | 5 (2.0)                        | 6 (2.4)                         | 12 (1.6)                         | 10 (2.5)                      |
| Influenza B                   | 62 (3.2)                     | 4 (1.3)                    | 9 (3.6)                        | 10 (4.1)                        | 24 (3.2)                         | 15 (3.8)                      |
| Parainfluenza Virus 1         | 24 (1.2)                     | 4 (1.3)                    | 12 (4.8)                       | 4 (1.6)                         | 3 (0.4)                          | 1 (0.3)                       |
| Parainfluenza Virus 2         | 10 (0.5)                     | 4 (1.3)                    | 4 (1.6)                        | 0 (0.0)                         | 2 (0.3)                          | 0 (0.0)                       |
| Parainfluenza Virus 3         | 99 (5.1)                     | 31 (9.8)                   | 20 (8.0)                       | 3 (1.2)                         | 27 (3.6)                         | 18 (4.6)                      |
| Parainfluenza Virus 4         | 7 (0.4)                      | 3 (1.0)                    | 2 (0.8)                        | 1 (0.4)                         | 1 (0.1)                          | 0 (0.0)                       |
| Respiratory Syncytial Virus A | 28 (1.4)                     | 13 (4.1)                   | 6 (2.4)                        | 3 (1.2)                         | 2 (0.3)                          | 4 (1.0)                       |
| Respiratory Syncytial Virus B | 83 (4.3)                     | 33 (10.5)                  | 19 (7.6)                       | 6 (2.4)                         | 15 (2.0)                         | 10 (2.5)                      |
| <i>Chlamydia pneumoniae</i>   | 3 (0.2)                      | 0 (0.0)                    | 0 (0.0)                        | 1 (0.4)                         | 1 (0.1)                          | 1 (0.3)                       |
| <i>Mycoplasma pneumoniae</i>  | 5 (0.3)                      | 1 (0.3)                    | 1 (0.4)                        | 2 (0.8)                         | 1 (0.1)                          | 0 (0.0)                       |

**Table S3. Positive and Negative Percent Agreement of the ePlex RP Panel With Comparator Methods by Organism**

|                                              |        | Positive % Agreement |                  | Negative % Agreement   |                  |
|----------------------------------------------|--------|----------------------|------------------|------------------------|------------------|
|                                              |        | TP/TP+FN             | % (95% CI)       | TN/TN+FP               | NPA (95% CI)     |
| <b>Adenovirus</b>                            |        |                      |                  |                        |                  |
| Prospectively-Collected Samples              | Fresh  | 6/8 <sup>a</sup>     | 75.0 (40.9-92.9) | 499/503 <sup>a</sup>   | 99.2 (98.0-99.7) |
|                                              | Frozen | 48/53 <sup>b</sup>   | 90.6 (79.7-95.9) | 1874/1898 <sup>b</sup> | 98.7 (98.1-99.1) |
|                                              | TOTAL  | 54/61                | 88.5 (78.2-94.3) | 2373/2401              | 98.8 (98.3-99.2) |
| <b>Coronavirus</b>                           |        |                      |                  |                        |                  |
| Prospectively-Collected Samples              | Fresh  | 7/7                  | 100 (64.6-100)   | 503/504                | 99.8 (98.9-100)  |
|                                              | Frozen | 89/110 <sup>c</sup>  | 80.9 (72.6-87.2) | 1828/1841 <sup>d</sup> | 99.3 (98.8-99.6) |
|                                              | TOTAL  | 96/117               | 82.1 (74.1-88.0) | 2331/2345              | 99.4 (99.0-99.6) |
| <b>Human Metapneumovirus</b>                 |        |                      |                  |                        |                  |
| Prospectively-Collected Samples              | Fresh  | 0/0                  | ---              | 511/511                | 100 (99.3-100)   |
|                                              | Frozen | 107/113 <sup>e</sup> | 94.7 (88.9-97.5) | 1832/1838 <sup>e</sup> | 99.7 (99.3-99.9) |
|                                              | TOTAL  | 107/113              | 94.7 (88.9-97.5) | 2343/2349              | 99.7 (99.4-99.9) |
| <b>Human Rhinovirus/Enterovirus</b>          |        |                      |                  |                        |                  |
| Prospectively-Collected Samples              | Fresh  | 176/183 <sup>f</sup> | 96.2 (92.3-98.1) | 316/328 <sup>f</sup>   | 96.3 (93.7-97.9) |
|                                              | Frozen | 317/336 <sup>g</sup> | 94.3 (91.3-96.4) | 1544/1615 <sup>g</sup> | 95.6 (94.5-96.5) |
|                                              | TOTAL  | 493/519              | 95.0 (92.8-96.6) | 1860/1943              | 95.7 (94.7-96.5) |
| <b>Influenza A</b>                           |        |                      |                  |                        |                  |
| Prospectively-Collected Samples <sup>h</sup> | Fresh  | 0/0                  | ---              | 511/511                | 100 (99.3-100)   |
|                                              | Frozen | 106/111 <sup>i</sup> | 95.5 (89.9-98.1) | 1836/1840 <sup>i</sup> | 99.8 (99.4-99.9) |
|                                              | TOTAL  | 106/111              | 95.5 (89.9-98.1) | 2347/2351              | 99.8 (99.6-99.9) |
| <b>Influenza A H1</b>                        |        |                      |                  |                        |                  |
| Prospectively-Collected Samples              | Fresh  | 0/0                  | ---              | 511/511                | 100 (99.3-100)   |
|                                              | Frozen | 0/0                  | ---              | 1951/1951              | 100 (99.8-100)   |
|                                              | TOTAL  | 0/0                  | ---              | 2462/2462              | 100 (99.8-100)   |
| <b>Influenza A 2009 H1N1</b>                 |        |                      |                  |                        |                  |
| Prospectively-Collected Samples              | Fresh  | 0/0                  | ---              | 511/511                | 100 (99.3-100)   |
|                                              | Frozen | 70/71                | 98.6 (92.4-99.8) | 1874/1880 <sup>j</sup> | 99.7 (99.3-99.9) |
|                                              | TOTAL  | 70/71                | 98.6 (92.4-99.8) | 2385/2391              | 99.7 (99.5-99.9) |
| <b>Influenza A H3</b>                        |        |                      |                  |                        |                  |
| Prospectively-Collected Samples              | Fresh  | 0/0                  | ---              | 511/511                | 100 (99.3-100)   |
|                                              | Frozen | 34/37 <sup>k</sup>   | 91.9 (78.7-97.2) | 1914/1914              | 100 (99.8-100)   |
|                                              | TOTAL  | 34/37                | 91.9 (78.7-97.2) | 2425/2425              | 100 (99.8-100)   |
| <b>Influenza B</b>                           |        |                      |                  |                        |                  |
| Prospectively-Collected Samples              | Fresh  | 1/1                  | 100 (20.7-100)   | 509/510                | 99.8 (98.9-100)  |
|                                              | Frozen | 58/65 <sup>l</sup>   | 89.2 (79.4-94.7) | 1882/1886 <sup>l</sup> | 99.8 (99.5-99.9) |
|                                              | TOTAL  | 59/66                | 89.4 (79.7-94.8) | 2391/2396              | 99.8 (99.5-99.9) |

|                                      |        | PPA                 |                  | Negative % Agreement   |                  |
|--------------------------------------|--------|---------------------|------------------|------------------------|------------------|
|                                      |        | TP/TP+FN            | % (95% CI)       | TN/TN+FP               | NPA (95% CI)     |
| <b>Parainfluenza Virus 1</b>         |        |                     |                  |                        |                  |
| Prospectively-Collected Samples      | Fresh  | 1/1                 | 100 (20.7-100)   | 510/510                | 100 (99.3-100)   |
|                                      | Frozen | 23/24               | 95.8 (79.8-99.3) | 1926/1927              | 99.9 (99.7-100)  |
|                                      | TOTAL  | 24/25               | 96.0 (80.5-99.3) | 2436/2437              | 100 (99.8-100)   |
| <b>Parainfluenza Virus 2</b>         |        |                     |                  |                        |                  |
| Prospectively-Collected Samples      | Fresh  | 12/13               | 92.3 (66.7-98.6) | 497/498                | 99.8 (98.9-100)  |
|                                      | Frozen | 9/9                 | 100 (70.1-100)   | 1941/1942              | 99.9 (99.7-100)  |
|                                      | TOTAL  | 21/22               | 95.5 (78.2-99.2) | 2438/2440              | 99.9 (99.7-100)  |
| <b>Parainfluenza Virus 3</b>         |        |                     |                  |                        |                  |
| Prospectively-Collected Samples      | Fresh  | 5/5                 | 100 (56.6-100)   | 506/506                | 100 (99.2-100)   |
|                                      | Frozen | 94/104 <sup>m</sup> | 90.4 (83.2-94.7) | 1842/1847 <sup>m</sup> | 99.7 (99.4-99.9) |
|                                      | TOTAL  | 99/109              | 90.8 (83.9-94.9) | 2348/2353              | 99.8 (99.5-99.9) |
| <b>Parainfluenza Virus 4</b>         |        |                     |                  |                        |                  |
| Prospectively-Collected Samples      | Fresh  | 3/3                 | 100 (43.9-100)   | 503/508 <sup>n</sup>   | 99.0 (97.7-99.6) |
|                                      | Frozen | 5/5                 | 100 (56.6-100)   | 1944/1946              | 99.9 (99.6-100)  |
|                                      | TOTAL  | 8/8                 | 100 (67.6-100)   | 2447/2454              | 99.7 (99.4-99.9) |
| <b>Respiratory Syncytial Virus A</b> |        |                     |                  |                        |                  |
| Prospectively-Collected Samples      | Fresh  | 8/9                 | 88.9 (56.5-98.0) | 501/501                | 100 (99.2-100)   |
|                                      | Frozen | 27/31               | 87.1 (71.1-94.9) | 1917/1918              | 99.9 (99.7-100)  |
|                                      | TOTAL  | 35/40               | 87.5 (73.9-94.5) | 2418/2419              | 100 (99.8-100)   |
| <b>Respiratory Syncytial Virus B</b> |        |                     |                  |                        |                  |
| Prospectively-Collected Samples      | Fresh  | 9/10                | 90.0 (59.6-98.2) | 500/500                | 100 (99.2-100)   |
|                                      | Frozen | 81/86               | 94.2 (87.1-97.5) | 1861/1863 <sup>o</sup> | 99.9 (99.6-100)  |
|                                      | TOTAL  | 90/96               | 93.8 (87.0-97.1) | 2361/2363              | 99.9 (99.7-100)  |
| <b><i>Chlamydia pneumoniae</i></b>   |        |                     |                  |                        |                  |
| Prospectively-Collected Samples      | Fresh  | 0/0                 | ---              | 511/511                | 100 (99.3-100)   |
|                                      | Frozen | 2/5 <sup>p</sup>    | 40.0 (11.8-76.9) | 1945/1946 <sup>p</sup> | 99.9 (99.7-100)  |
|                                      | TOTAL  | 2/5                 | 40.0 (11.8-76.9) | 2456/2457              | 100 (99.8-100)   |
| <b><i>Mycoplasma pneumoniae</i></b>  |        |                     |                  |                        |                  |
| Prospectively-Collected Samples      | Fresh  | 3/3                 | 100 (43.9-100)   | 507/508 <sup>q</sup>   | 99.8 (98.9-100)  |
|                                      | Frozen | 4/5 <sup>f</sup>    | 80.0 (37.6-96.4) | 1945/1946              | 99.9 (99.7-100)  |
|                                      | TOTAL  | 7/8                 | 87.5 (52.9-97.8) | 2452/2454              | 99.9 (99.7-100)  |

<sup>a</sup> Adenovirus was not detected in 2 of 2 FN samples and detected in 4 of 4 FP samples using PCR/sequencing.

<sup>b</sup> Adenovirus was not detected in 1 of 5 FN samples and detected in 9 of 24 FP samples using PCR/sequencing.

<sup>c</sup> Coronavirus was not detected in 2 of 21 FN samples and detected in 3 of 13 FP samples using PCR/sequencing.

<sup>e</sup> Human metapneumovirus was not detected in 1 of 6 FN samples and detected in 4 of 6 FP samples using PCR/sequencing.

<sup>f</sup> Human rhinovirus/enterovirus was not detected in 1 of 7 FN samples and detected in 9 of 12 FP samples using PCR/sequencing.

<sup>g</sup> Human rhinovirus/enterovirus was not detected in 6 of 19 FN samples and detected in 33 of 71 FP samples using PCR/sequencing.

- <sup>b</sup>Influenza A comparator results contain 71 samples with A 2009 H1N1, 37 samples with A H3, and 3 samples with no subtype detected
- <sup>i</sup>Influenza A was not detected in 1 of 3 FN samples (2 samples were not tested) and detected in 1 of 4 FP samples using PCR/sequencing.
- <sup>j</sup>Influenza A H1-2009 was detected in 4 of 6 FP samples using PCR/sequencing
- <sup>k</sup>Influenza A H3 was not detected in 1 of 3 FN samples using PCR/sequencing.
- <sup>l</sup>Influenza B was not detected in 3 of 7 FN samples and detected in 2 of 4 FP samples using PCR/sequencing.
- <sup>m</sup>Parainfluenza virus 3 was not detected in 3 of 10 FN samples and detected in 4 of 5 FP samples using PCR/sequencing
- <sup>n</sup>Parainfluenza virus 4 was detected in 3 of 5 FP samples using PCR/sequencing.
- <sup>o</sup>RSV B was detected in 1 of 2 FP samples using PCR/sequencing.
- <sup>p</sup>*C. pneumoniae* was not detected in 1 of 3 FN samples and detected in the 1 FP sample using PCR/sequencing.
- <sup>q</sup>*M. pneumoniae* was detected in the 1 FP sample using PCR/sequencing.
- <sup>r</sup>*M. pneumoniae* was not detected in the 1 FN sample using PCR/sequencing.
